# Supplementary material
Source: PubMed Central journal article supplement (PMC5098423)
Supplement: NIHMS715432-supplement-Supplemntary_Files.pdf [file NIHMS715432-supplement-Supplemntary_Files.pdf]

## Supporting Information

Table S1: Active Site Titration Data for MUTYH and Variants

| <b>Enzyme</b> | <b>Total protein (mg/L)</b>                                | <b>Total active yield (µg/L)</b>                                |
|---------------|------------------------------------------------------------|-----------------------------------------------------------------|
| WT MUTYH      | 1.0, 1.1, 1.1, 0.9, 1.0, 2.0, 0.9, 0.9, 1.3                | 9, 10, 9, 7, 9, 20, 10, 15                                      |
| R295C MUTYH   | 0.9, 0.5, 0.2, 0.5, 0.4, 0.4, 0.3, 0.9                     | 0.2, 0.4, 0.6, 0.7, 0.8, 0.8, 0.5, 0.6                          |
| P281L MUTYH   | 0.6, 0.6, 0.3, 0.4, 0.6                                    | <0.01                                                           |
| Q324H MUTYH   | 1.2, 1.1, 0.9, 1.1, 1.1, 1.0, 2.0, 1.1, 0.7, 0.8, 1.2, 1.3 | 6.7, 16, 7, 12, 8, 7.7, 14, 12, 8, 8, 7.7, 10                   |
| P502L MUTYH   | 0.8, 0.3, 0.9, 0.9, 1.3, 0.5                               | 10, 6, 20, 14, 25,                                              |
| R520Q MUTYH   | 0.3, 0.3, 0.6, 0.4, 0.5, 0.2, 0.4, 0.2, 0.6, 0.6           | 0.7, 0.4, 0.5, 2.0, 0.4, 0.2, 0.5, 0.2, 1.2, 0.4, 1.3, 0.9, 1.0 |

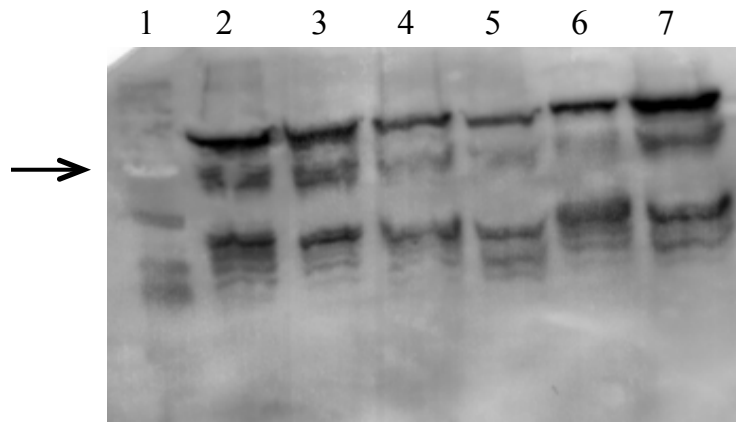

**Figure S1:** Western blot analysis of the overexpression of WT MUTYH and MUTYH missense variants located in protein functional domains. From left: lane 1: marker, with highlight at 80 kDa (indicated by arrow); lane 2: WT MUTYH (~102 kDa); lane 3: Q324H MUTYH; lane 4: P281L MUTYH; lane 5: R520Q MUTYH; lane 6: R295C MUTYH; and lane 7: P502L MUTYH. Similar amounts of cell lysate were added to each well.

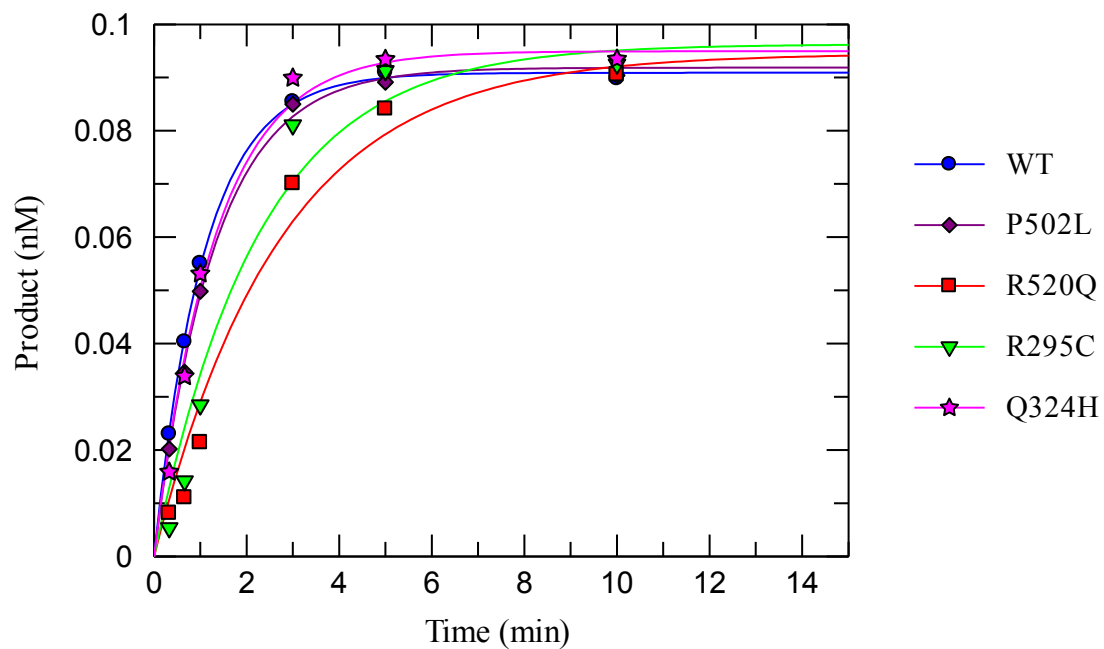

**Figure S2.** Comparison of Adenine Glycosylase Activity of WT MUTYH relative to MUTYH Variants. Shown are representative plots from adenine glycosylase assays performed under single-turnover conditions of WT MUTYH and MUTYH missense variants with an OG:A-containing DNA substrate in buffer containing 60 mM NaCl at 37 °C. The values for the rate constant  $k_2$  were determined from at least three separate experiments for each enzyme (from different enzyme preparations) and were averaged (Table 1).
